# Supplementary material for: Phase-locked laser arrays through global antenna mutual coupling
Source: Springer Nature journal article supplement (doi:10.1038/nphoton.2016.104), 2016-06-13
Supplement: nphoton.2016.104-s1.pdf [file nphoton.2016.104-s1.pdf]

Browse Articles
| Nature Photonics


Skip to main content

Thank you for visiting nature.com. You are using a browser version with limited support for CSS. To obtain
the best experience, we recommend you use a more up to date browser (or turn off compatibility mode in
Internet Explorer). In the meantime, to ensure continued support, we are displaying the site without styles
and JavaScript.

Advertisement


- View all journals
- Search
- Log in

- Explore content
- About the journal
- Publish with us

- Sign up for alerts
- RSS feed


1. nature
2. nature photonics
3. browse articles

# Browse Articles

## Filter By:

Article Type

All

- All
- Article (944)
- Author Correction (37)
- Books & Arts (50)
- Business News (26)
- Comment (24)
- Commentary (72)
- Correction (29)
- Correspondence (59)
- Corrigendum (24)
- Editorial (181)
- Industry Perspective (66)
- Interview (142)
- Letter (713)
- News & Views (1085)
- Product Focus (26)
- Product Highlights (26)
- Publisher Correction (32)
- Research Highlight (106)
- Research Highlights (684)
- Review Article (168)

Year

All

- All
- 2024 (85)
- 2023 (210)
- 2022 (196)
- 2021 (195)
- 2020 (171)
- 2019 (234)
- 2018 (253)
- 2017 (262)
- 2016 (264)
- 2015 (267)
- 2014 (333)
- 2013 (376)
- 2012 (359)
- 2011 (313)
- 2010 (311)
- 2009 (264)
- 2008 (284)
- 2007 (266)
- 2006 (47)

- ### Sub-cycle photonics in correlated materials

  Sub-cycle confinement and control of phase transitions in strongly correlated materials are theoretically demonstrated, potentially providing a way to investigate electron dynamics on timescales previously unattainable with these materials.

  - Eleftherios Goulielmakis

  News & Views26 Apr 2024
- ### Turnkey locking of quantum-dot lasers directly grown on Si

  A quantum-dot laser directly grown on silicon that is scalable, low cost with an intrinsic linewidth of 16 Hz when subject to feedback from a low-quality-factor external cavity is reported.

  - Bozhang Dong
  - Yating Wan
  - John E. Bowers

  ArticleOpen Access26 Apr 2024
- ### Reviving holographic photonic integration

  Holographic waveguides using shallow etching of silicon-on-insulator waveguides makes designing integrated, preset optical vector matrix multiplication computationally tractable and commercially available.

  - Daniel Brunner

  News & Views24 Apr 2024
- ### Observation of Landau levels and chiral edge states in photonic crystals through pseudomagnetic fields induced by synthetic strain

  Strain-engineered pseudomagnetic fields realized in two-dimensional photonic crystals induce flat-band Landau levels at discrete energies as well as chiral edge states. The high density of states and high degeneracy of the flat bands has implications for both on-chip and radiating light fields.

  - René Barczyk
  - L. Kuipers
  - Ewold Verhagen

  Article23 Apr 2024
- ### Non-reciprocal band structures in an exciton–polariton Floquet optical lattice

  A frequency detuning between two pump lasers enables an exciton–polariton Floquet optical lattice and a polariton ‘conveyor belt’. The findings pave the way for Floquet engineering in polariton condensates.

  - Yago del Valle Inclan Redondo
  - Xingran Xu
  - Michael D. Fraser

  ArticleOpen Access23 Apr 2024
- ### Direct observation of Landau levels in silicon photonic crystals

  Photonic Landau levels are demonstrated via a strain-induced pseudomagnetic field in a silicon photonic crystal slab.

  - Maria Barsukova
  - Fabien Grisé
  - Mikael C. Rechtsman

  Article23 Apr 2024
- ### Electrochemically controlled blinking of fluorophores for quantitative STORM imaging

  Electrochemical control of the switching of fluorophores in stochastic optical reconstruction microscopy (EC-STORM) enables the counting of single fluorophores as well as cell imaging with improved spatial resolution and reduced artefacts compared with traditional STORM.

  - Ying Yang
  - Yuanqing Ma
  - J. Justin Gooding

  ArticleOpen Access19 Apr 2024
- ### Author Correction: Parametrically driven pure-Kerr temporal solitons in a chip-integrated microcavity

  - Grégory Moille
  - Miriam Leonhardt
  - Miro Erkintalo

  Author Correction18 Apr 2024
- ### Random-access wide-field mesoscopy for centimetre-scale imaging of biodynamics with subcellular resolution

  Random-access wide-field mesoscopy enables the imaging of in vivo biodynamics in mice over an area of 160 mm2 and at a subcellular spatial resolution of about 2 μm.

  - Ruheng Shi
  - Xinyue Chen
  - Lingjie Kong

  ArticleOpen Access17 Apr 2024
- ### Mid-infrared wide-field nanoscopy

  Wide-field mid-infrared photothermal imaging is developed to supress the resolution degradation caused by photo-thermal heat diffusion. By employing a single-objective synthetic-aperture imaging with synchronized subnanosecond mid-infrared and visible light sources, spatial resolution of 120 nm is obtained.

  - Miu Tamamitsu
  - Keiichiro Toda
  - Takuro Ideguchi

  Article17 Apr 2024
- ### Experimental demonstration of attosecond pump–probe spectroscopy with an X-ray free-electron laser

  Researchers have demonstrated the generation and control of subfemtosecond pulse pairs from a two-colour X-ray free-electron laser and conducted pump–probe experiments in core-ionized molecules.

  - Zhaoheng Guo
  - Taran Driver
  - Agostino Marinelli

  Article11 Apr 2024
- ### Nonreciprocal thermal photonics

  This Review discusses the physics of nonreciprocal radiation and Kirchhoff’s law generalization in the context of nanophotonics-enabled nonreciprocal thermal applications.

  - Shuihua Yang
  - Mengqi Liu
  - Cheng-Wei Qiu

  Review Article10 Apr 2024
- ### Epsilon-near-zero regime enables permanent ultrafast all-optical reversal of ferroelectric polarization

  Researchers reveal that naturally emerging epsilon-near-zero conditions in BaTiO3 can be exploited to drive permanent all-optical switching of ferroelectric polarization. The general nature of the epsilon-near-zero regime means that the approach could be used to switch spontaneous order parameters in other systems.

  - M. Kwaaitaal
  - D. G. Lourens
  - A. Kirilyuk

  Article09 Apr 2024
- ### Avalanche photodiode with ultrahigh gain–bandwidth product of 1,033 GHz

  Researchers demonstrate a germanium/silicon avalanche photodiode gain–bandwidth product over 1 THz operating at 1,550 nm wavelength. The findings have implications for future high-speed optoelectronic devices in next-generation optical interconnects.

  - Yang Shi
  - Xiang Li
  - Xinliang Zhang

  Article09 Apr 2024
- ### Metasurfaces for edge encoding with incoherent light

  - David Pile

  News & Views05 Apr 2024
- ### Cryogenic optical data link for superconducting circuits

  An optical fibre-fed superconducting electro-optic modulator with gigahertz bandwidth and attojoule per bit electric power consumption offers a fast, efficient means to connect superconducting circuits to the room temperature environment.

  - Paolo Pintus
  - Mo Soltani
  - Galan Moody

  News & Views05 Apr 2024
- ### Illuminating cancer with sonoafterglow

  Ultrasound-induced luminescence in trianthracene derivative-based nanoparticles enables tumour imaging and immunological profiling in a variety of in vivo models.

  - Cheng Xu
  - Kanyi Pu

  News & Views05 Apr 2024
- ### Single protein imaging with holography

  A non-common-path interferometric scheme enables holographic detection of single proteins of mass 90 kDa and estimation of single-protein polarizability.

  - Chia-Lung Hsieh

  News & Views05 Apr 2024
- ### Optical manipulation of spin resonance in gallium nitride

  A common direct-bandgap semiconductor has been found to host optically addressable spins, opening the door to scalable quantum sensor manufacturing.

  - Jake Horder
  - Igor Aharonovich

  News & Views05 Apr 2024
- ### Multiplication of the orbital angular momentum of phonon polaritons via sublinear dispersion

  The strong dispersion of surface phonon polaritons in silicon carbide films is exploited to tailor the orbital angular momentum of phonon polaritons, achieving reconfigurable polaritonic optical vortices that are attractive for orbital-angular-momentum-enabled light–matter interactions at mid-infrared frequencies.

  - Andrea Mancini
  - Lin Nan
  - Stefan A. Maier

  ArticleOpen Access02 Apr 2024

- Previous page
- page 1
- page 2
- page 3
- …
- page 235
- Next page

## Explore content

- Research articles
- Reviews & Analysis
- News & Comment
- Current issue
- Collections

- Follow us on Twitter
- Sign up for alerts
- RSS feed


## About the journal

- Aims & Scope
- Journal Information
- Journal Metrics
- About the Editors
- Our publishing models
- Editorial Values Statement
- Editorial Policies
- Content Types
- Web Feeds
- Contact
- Research Cross-Journal Editorial Team
- Reviews Cross-Journal Editorial Team


## Publish with us

- Submission Guidelines
- For Reviewers
- Language editing services
- Submit manuscript

## Search

Search articles by subject, keyword or author

Show results from

All journals
This journal

Search

Advanced search

### Quick links

- Explore articles by subject
- Find a job
- Guide to authors
- Editorial policies

Nature Photonics (*Nat. Photon.*)

ISSN 1749-4893 (online)

ISSN 1749-4885 (print)

## nature.com sitemap

### About Nature Portfolio

- About us
- Press releases
- Press office
- Contact us

### Discover content

- Journals A-Z
- Articles by subject
- protocols.io
- Nature Index

### Publishing policies

- Nature portfolio policies
- Open access

### Author & Researcher services

- Reprints & permissions
- Research data
- Language editing
- Scientific editing
- Nature Masterclasses
- Research Solutions

### Libraries & institutions

- Librarian service & tools
- Librarian portal
- Open research
- Recommend to library

### Advertising & partnerships

- Advertising
- Partnerships & Services
- Media kits
- Branded
  content

### Professional development

- Nature Careers
- Nature 
  Conferences

### Regional websites

- Nature Africa
- Nature China
- Nature India
- Nature Italy
- Nature Japan
- Nature Middle East

- Privacy
  Policy
- Use
  of cookies
- Your privacy choices/Manage cookies
- Legal
  notice
- Accessibility
  statement
- Terms & Conditions
- Your US state privacy rights

© 2024 Springer Nature Limited

xml version="1.0" encoding="UTF-8"?
